# Supplementary material for: Lipopolysaccharides-Induced Suppression of Innate-Like B Cell Apoptosis Is Enhanced by CpG Oligodeoxynucleotide and Requires Toll-Like Receptors 2 and 4
Source: PubMed Central journal article supplement (PMC5094738; doi:10.1371/journal.pone.0165862), 2016-11-03
Supplement: pone.0165862.s001.pdf [file pone.0165862.s001.pdf]

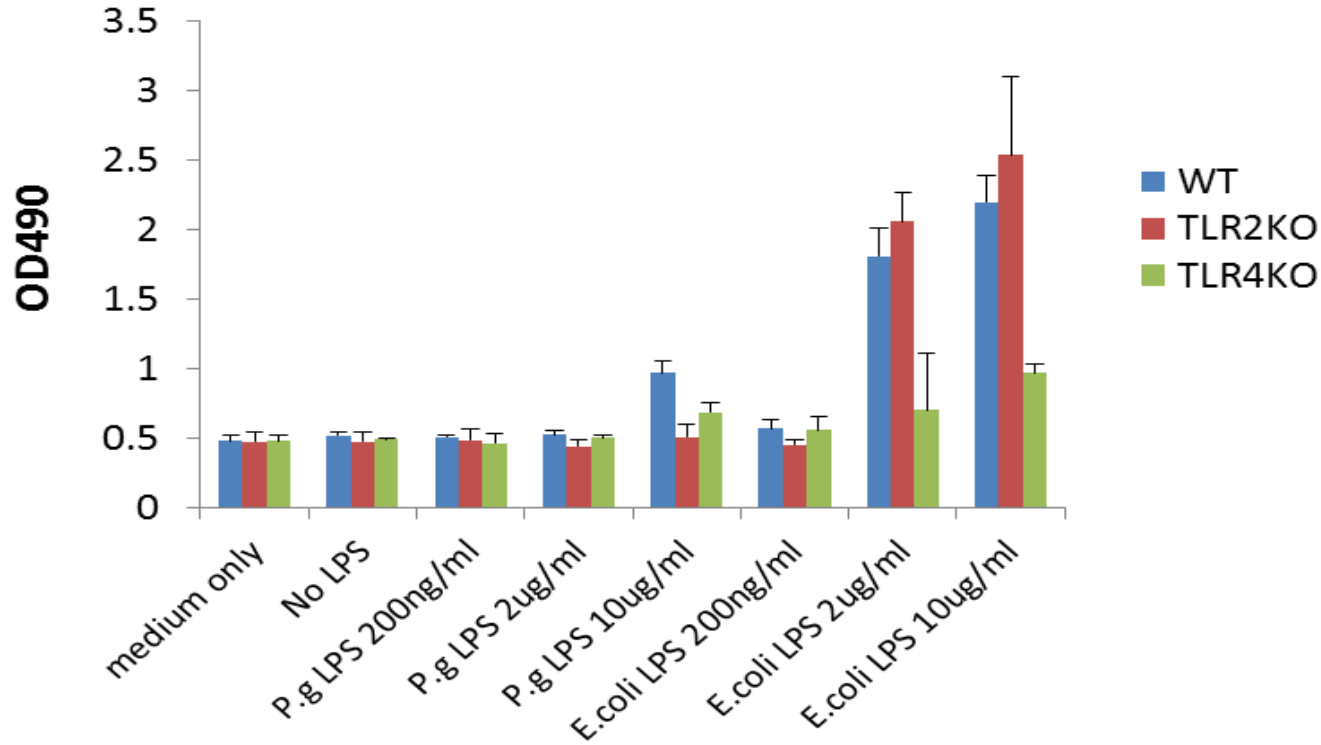

**S1 Fig. B cell proliferative response to *P. gingivalis* LPS and *E. coli* LPS stimulation.** Purified *B cells* ( $2 \times 10^5$ /well) were cultured in 200 $\mu$ l complete medium in 96-well plate for 2 days in the presence of *P. gingivalis* LPS or *E. coli* LPS (200ng, 2 $\mu$ g and 10 $\mu$ g/ml). MTS reagent was added (40 $\mu$ l/well) 4 hours before the termination of the experiment using a CellTiter 96 AQueous Assay kit (Promega Corp). After 4 hour incubation, the plate was read at OD 490nm using a microplate reader (BioTek). The absorbance of the formazan at 490nm was measured as an indication of cell proliferation. N=3.
